# Supplementary material
Source: Springer Nature journal article supplement (https://www.springermedizin.de/resource/supplementary/13002_2010_212_MOESM5_ESM.pdf/9627456)

Can you trust and rely solely on the TM for the treatment of your disease?

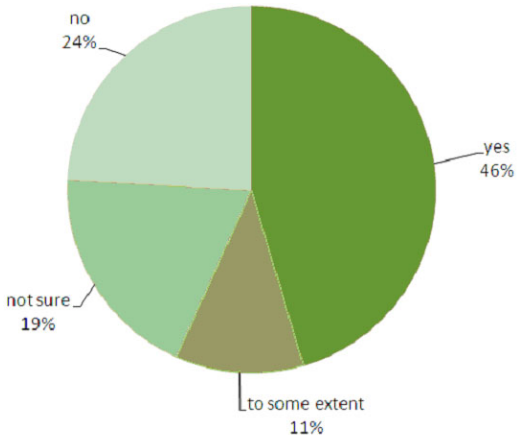

Supplement: MOESM5 [file 9627456]
